# Supplementary material for: Boron nanostructures obtainedviaultrasonic irradiation for high performance chemiresistive methane sensors
Source: Royal Society of Chemistry journal article supplement (doi:10.1039/c9na00749k), 2020-01-01
Supplement: c9na00749k1.pdf [file c9na00749k1.pdf]

## † Electronic Supporting Information (†ESI)

# Boron Nanostructures Obtained via Ultrasonic Irradiation for High Performance Chemiresistive Methane Sensors

*Ravindra Kumar Jha,<sup>a</sup> Aman Nanda,<sup>a</sup> and Navakanta Bhat<sup>\*a</sup>*

<sup>a</sup>Nano-Devices and Sensors Laboratory, Centre for Nanoscience and Engineering, Indian  
Institute of Science, Bangalore, Karnataka, India-560012

Email: navakant@iisc.ac.in

The custom-built gas sensing set-up is shown in Figure S1. An external bias voltage of 5V was applied during sensing measurement.

Figure S1. Custom built Gas sensing Setup

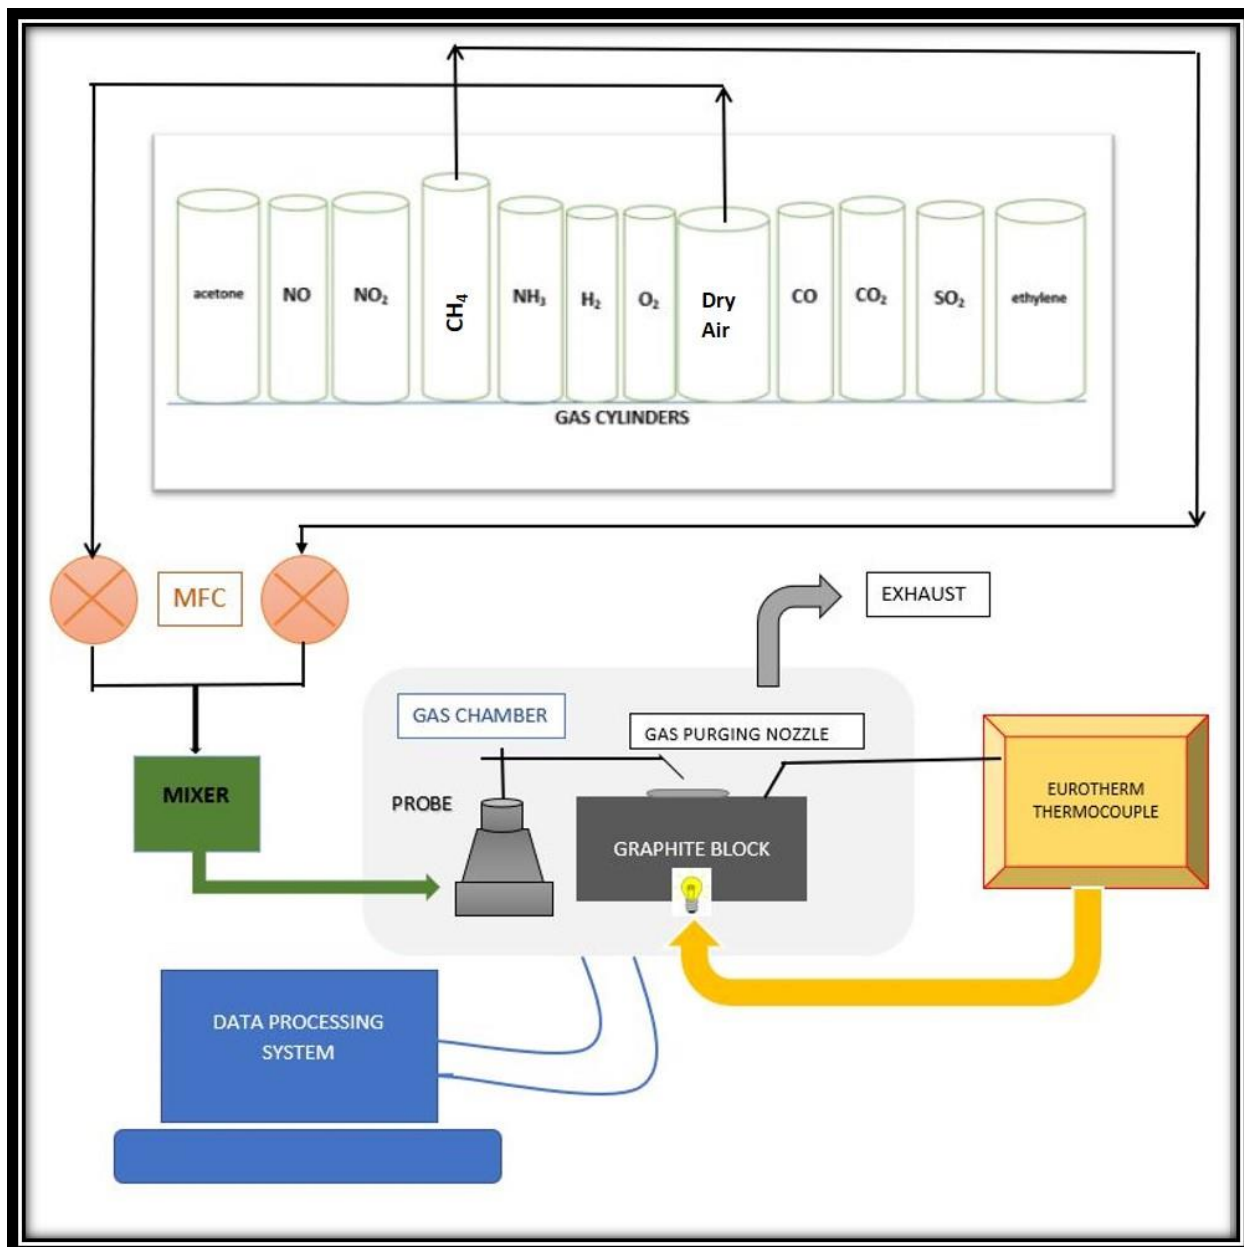

Figure S2. TGA Data for Bulk Boron and Few Layered Boron Sheets

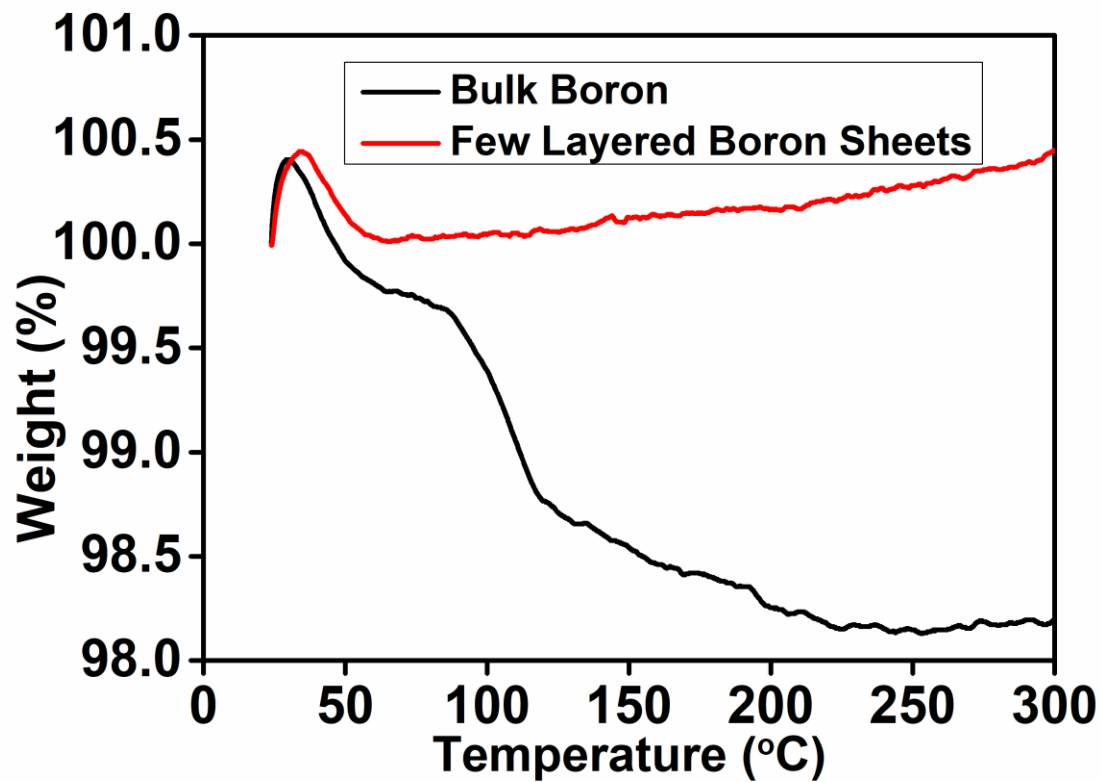

Figure S3. (a) pore size distribution in Bulk Boron

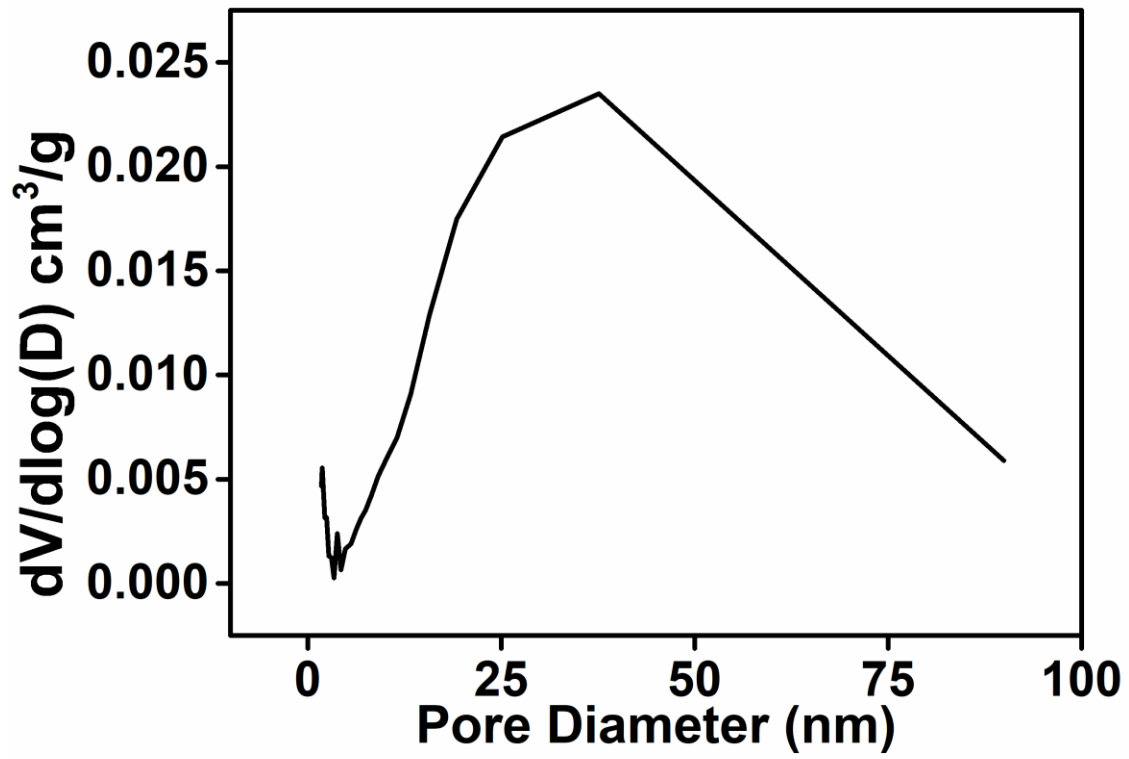

Figure S3. (b) pore size distribution in Exfoliated Boron Nanostructure

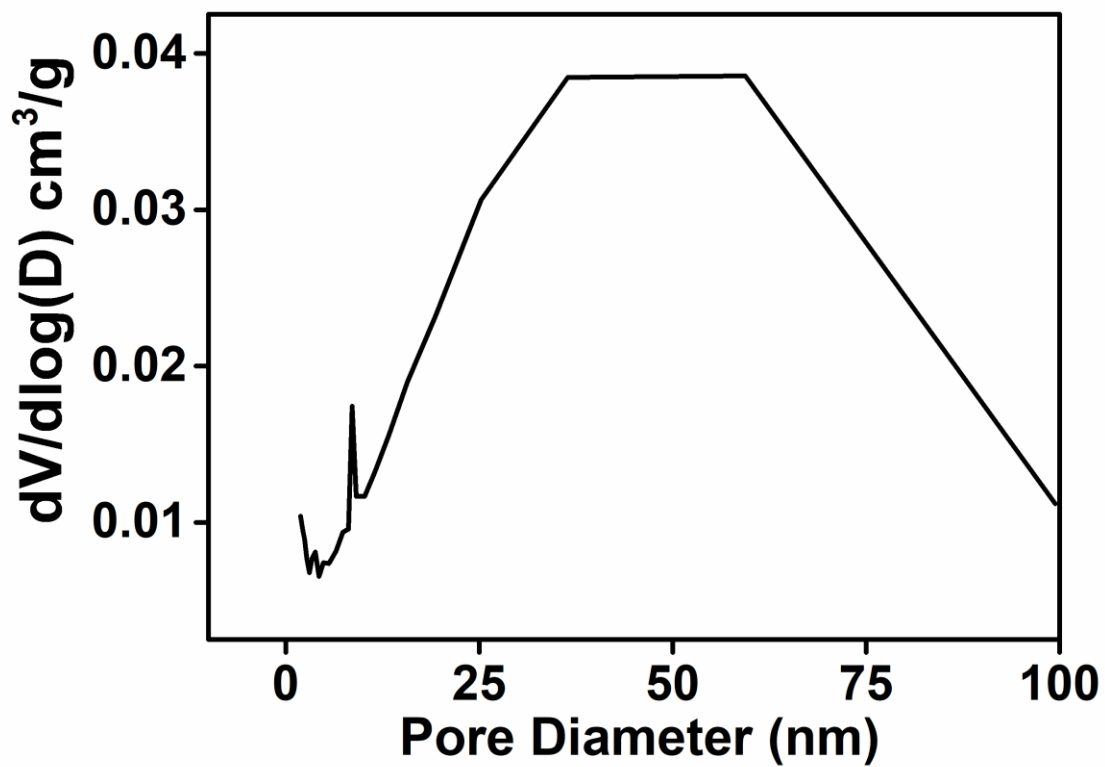

Figure S4. (a) AFM image of as obtained boron nanostructures

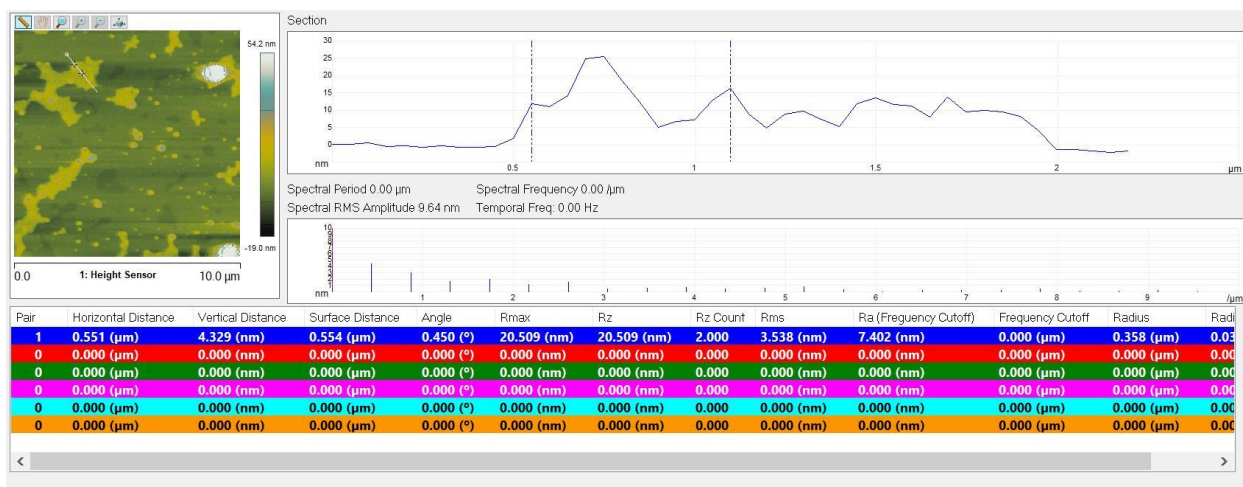

Figure S4. (b) and Raman spectrum corresponding to it

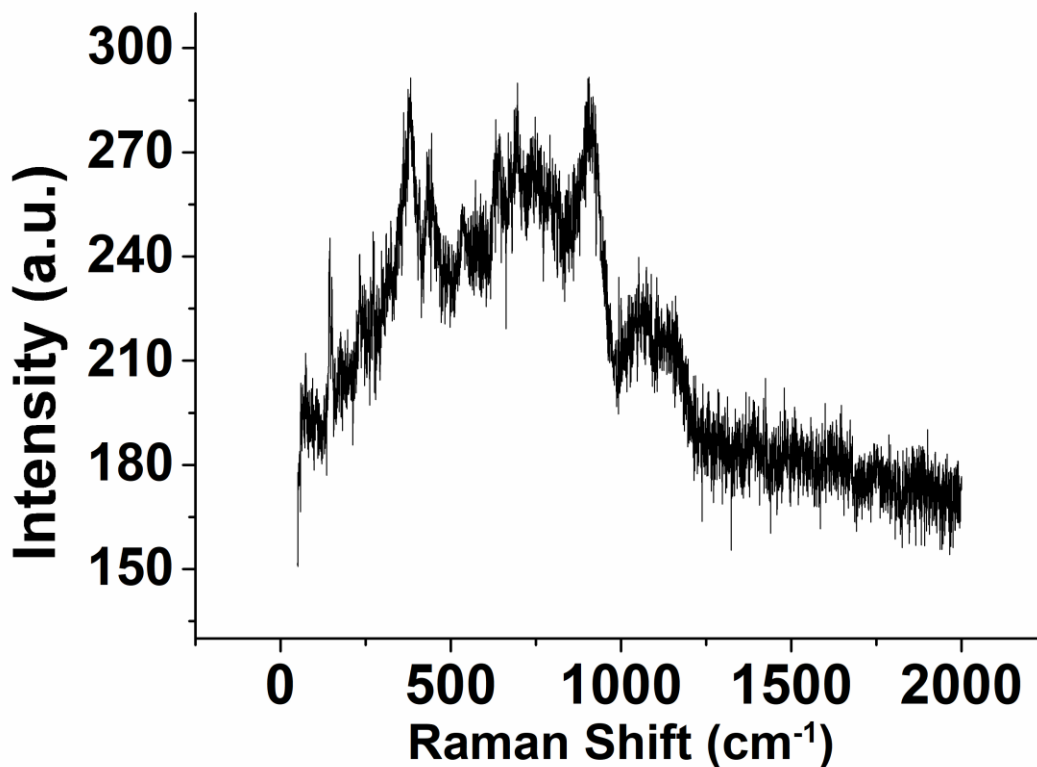

Figure S5. Selectivity of few layered boron nanostructures-based chemiresistive device

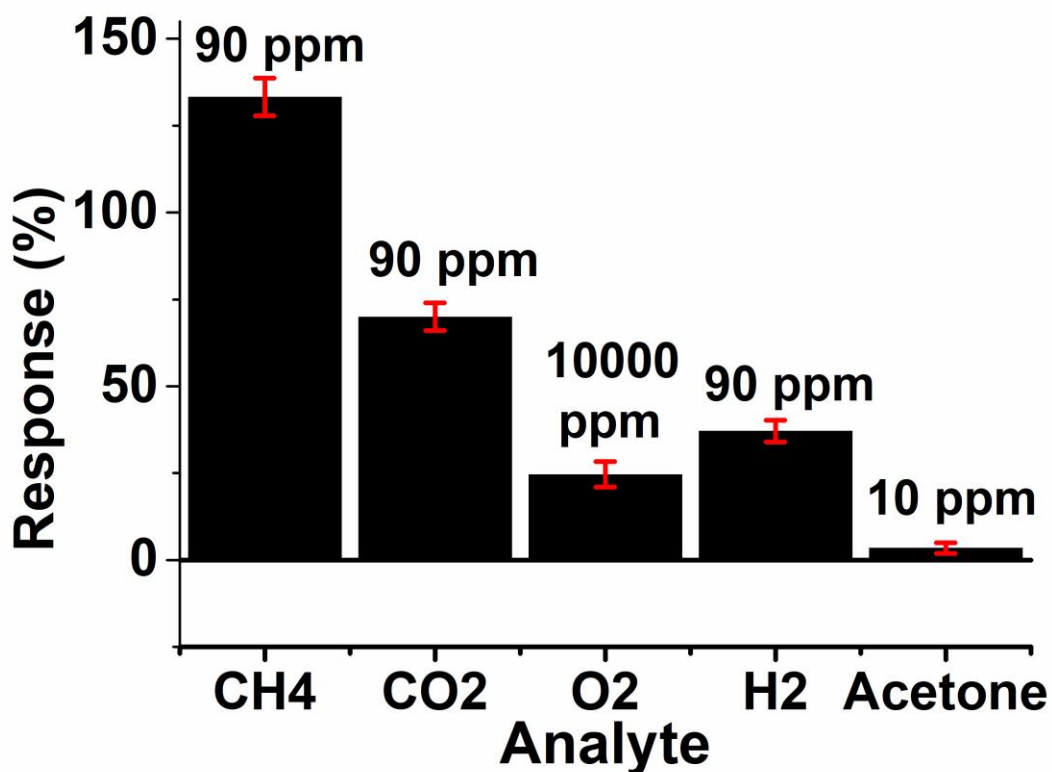

### Supplementary Note 1: Fabrication of Device

Interdigitated electrodes (IDEs) with width and gap of 5  $\mu\text{m}$  were fabricated on Si/SiO<sub>2</sub> by photolithography. In the first step, photoresist (AZ5214E) was spin coated (in steps of (i) 500 rpm for 5 seconds., (ii) 4000 rpm for 40seconds. and (iii) 500 rpm for 5 seconds.) on the Si/SiO<sub>2</sub> wafer. In the second step, it was exposed to UV light (for 6 seconds.; MJB4 mask aligner (Suss MicroTec)) after pre-baking (110°C for 600 seconds.). Development was done using MF 26A developer (for 18 seconds.) and was stopped by dipping in water. The Ti/Pt electrodes (10 nm/90 nm) were deposited using DC magnetron sputtering (Ti deposition: DC power 150 W, deposition time 25 seconds, Pt deposition: DC power 35 W, deposition time 150 seconds) followed by lift off. The optical micrograph of the finished device is shown in Fig. S6(a). 130 microlitre of exfoliated few layered boron sheets were dropcasted on the IDE fingers and calcinated at 120°C for half-an-hour hours in ambient to improve electrical contact. The optical micrograph of the finished device is shown in Fig. S6(b).

Fig. S6. Optical microscope image of the device (a) before dropcasting and (b) after dropcasting the sensing material

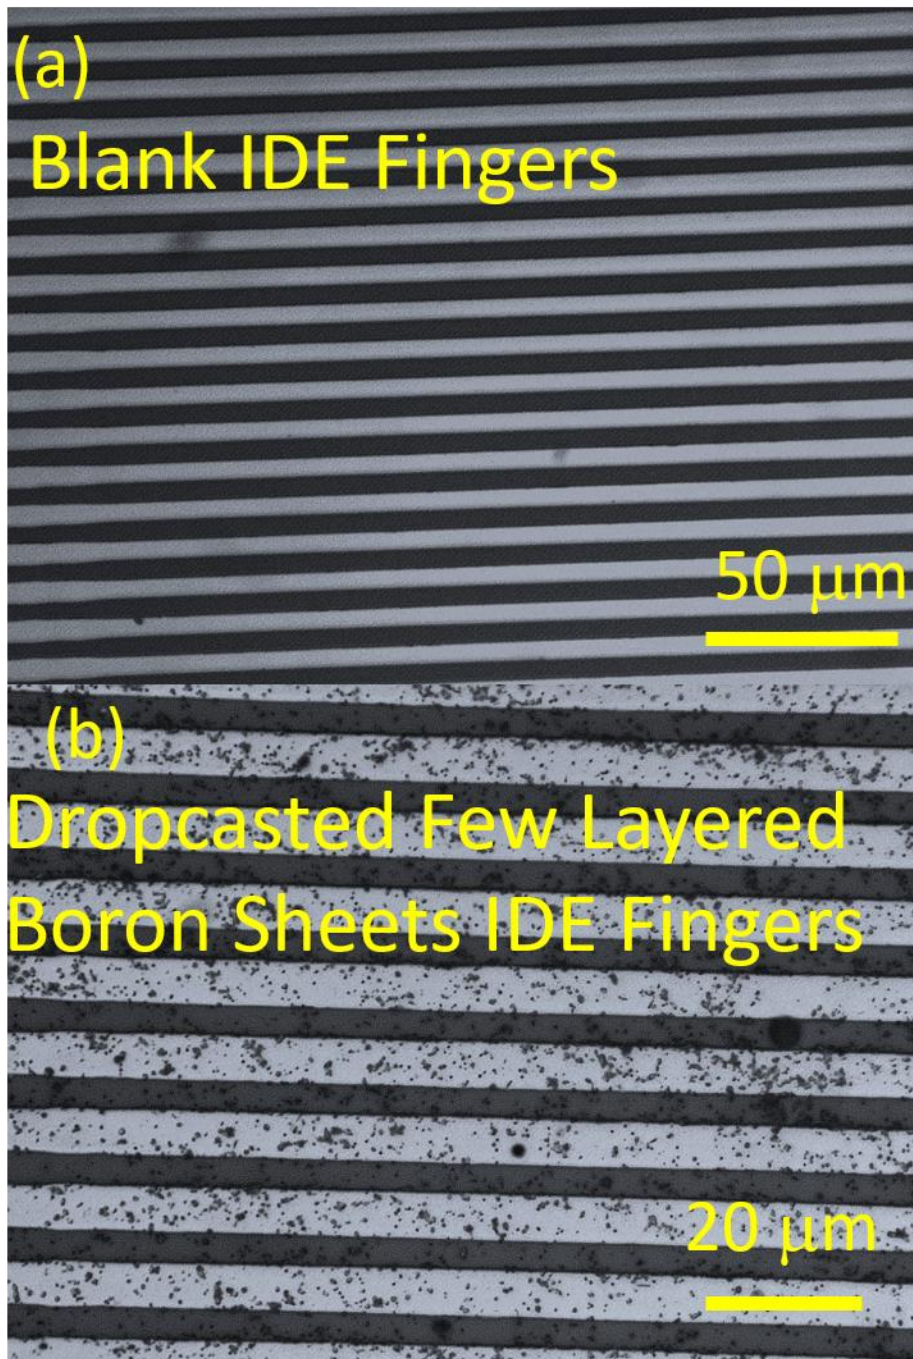



Fig. S7. Variation of response for four different devices

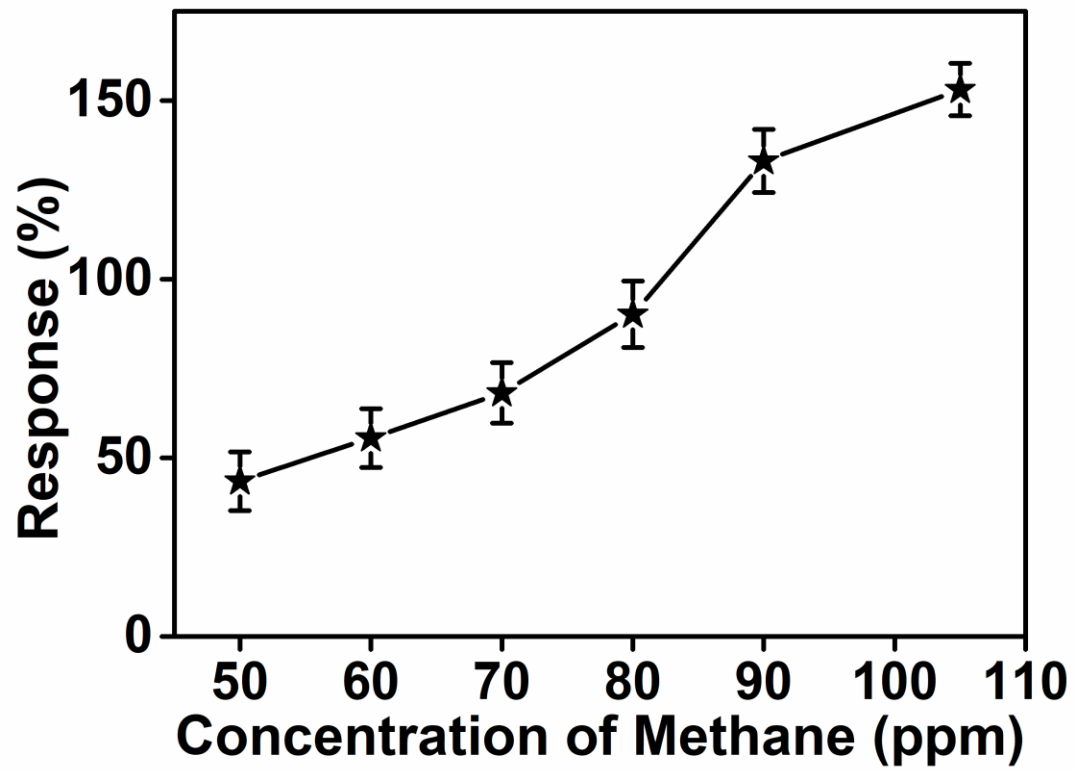

Fig. S8. (a) Large area Low Mag TEM image of as-prepared boron nanostructure

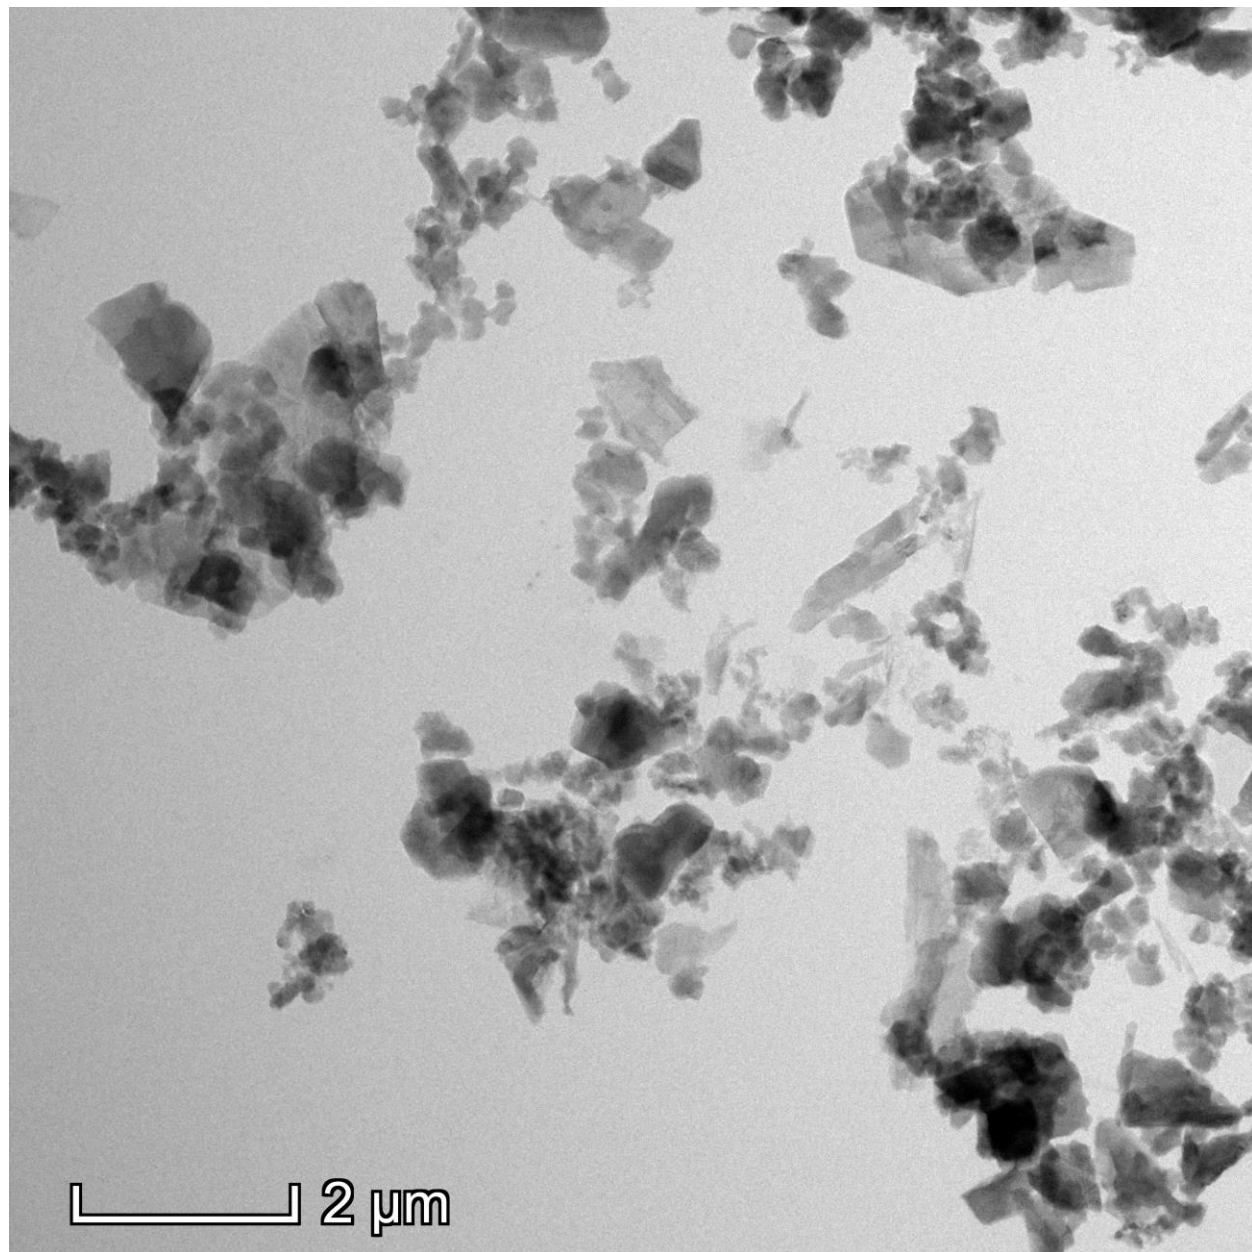

Fig. S8. (b) and its statistical distribution

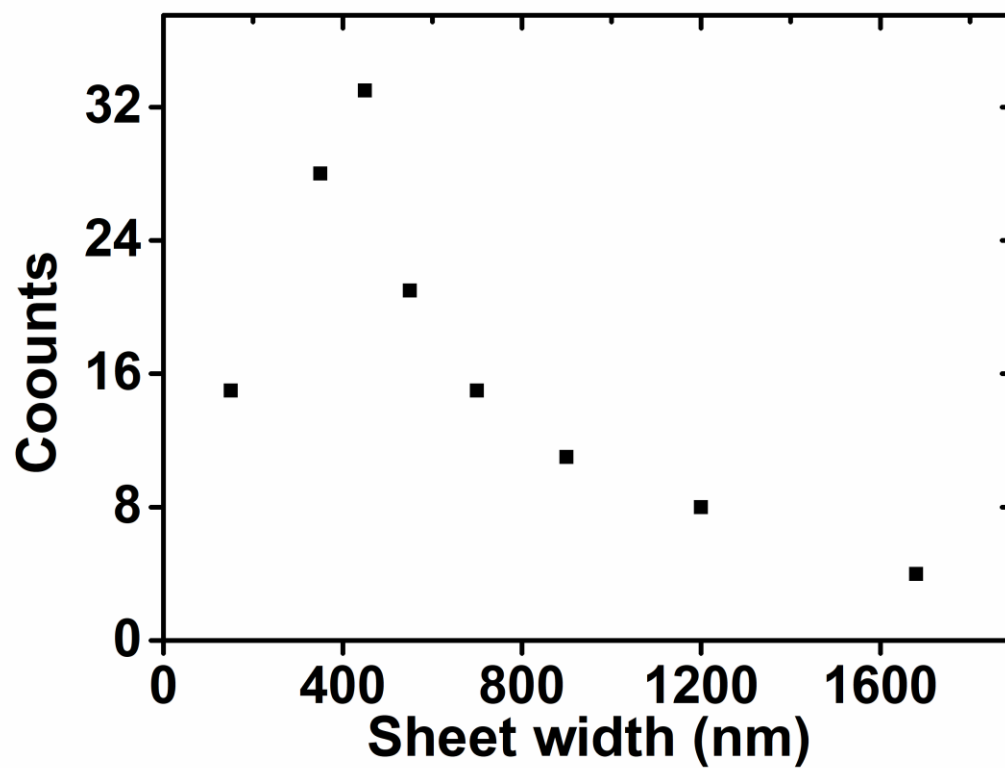

Fig. S9. XRD data of the exfoliated boron nanostructure after 3 months

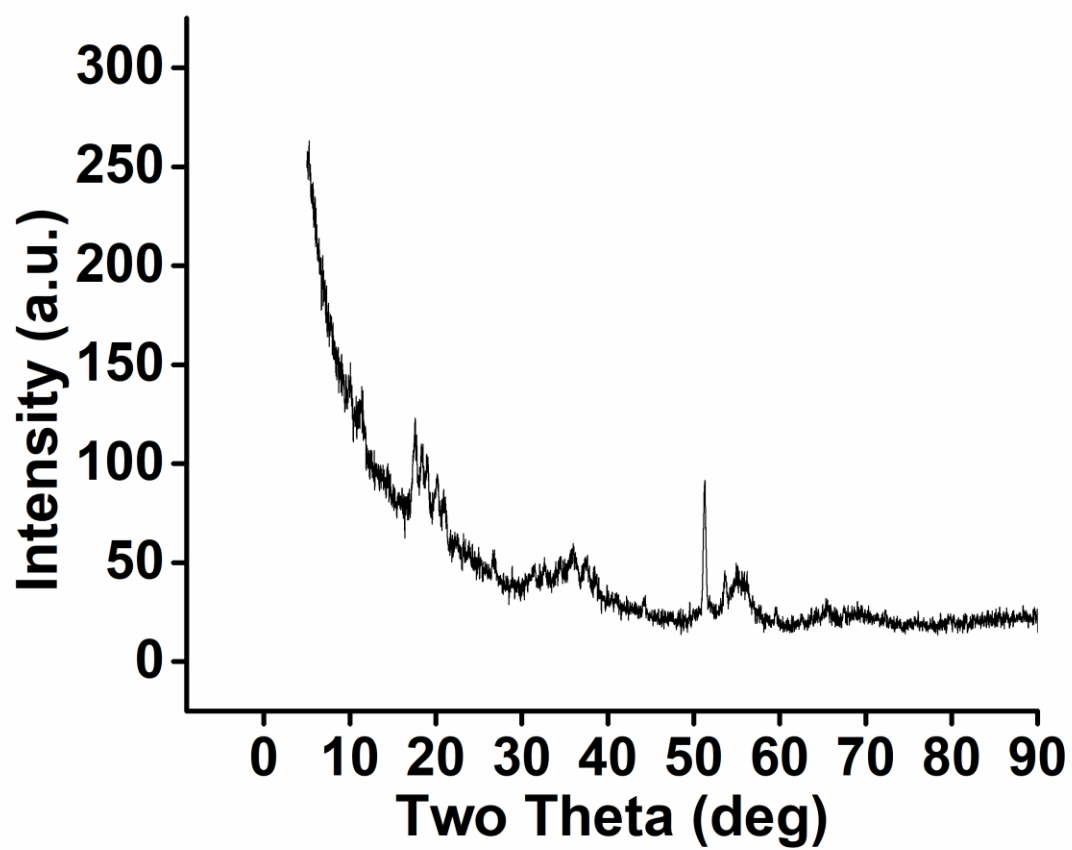

Fig. S10. XPS Survey Data for bulk and nanostructured Boron

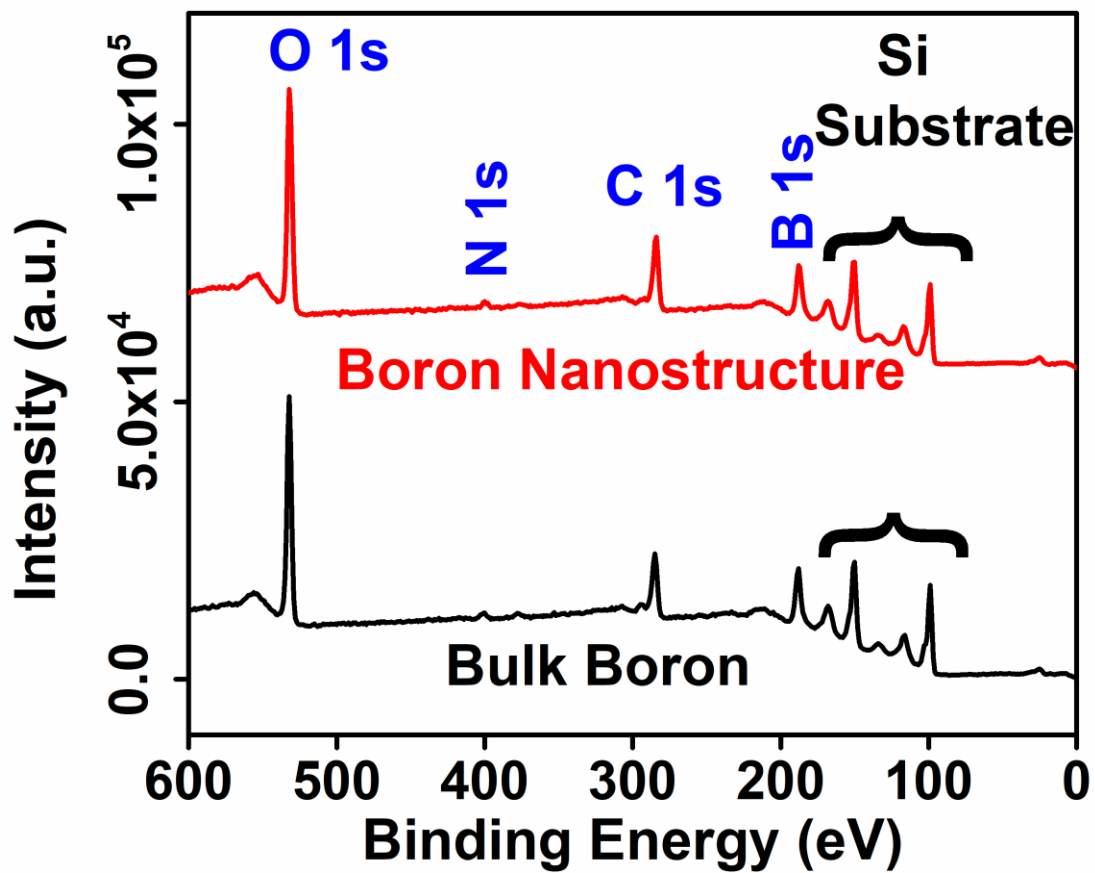

Table S1 Comparison of Few Layered Boron Sheets based methane sensor with other high performance methane sensor

| S.No | Material                                            | Response (%)      | Response Time/ Recovery Time (Seconds) | Operating Temperature (°C) | LOD                         | Ref.     |
|------|-----------------------------------------------------|-------------------|----------------------------------------|----------------------------|-----------------------------|----------|
| 1.   | ZnO                                                 | 87.3 @ 10,000 ppm | 8.3/17.8 @ 10,000 ppm                  | 250                        | 100 ppm                     | 1        |
| 2.   | SnO <sub>2</sub>                                    | 862 @ 2500 ppm    | ~30/- @ 2500 ppm                       | 300                        | 125 ppm                     | 2        |
| 3.   | In <sub>2</sub> O <sub>3</sub>                      | 225@ 10,000 ppm   | 200/- @10,000 ppm                      | 300                        | 2500 ppm                    | 3        |
| 4.   | Co <sub>3</sub> O <sub>4</sub>                      | 128 @ 10,000 ppm  | 100/50 @ 10,000 ppm                    | 200                        | 2500 ppm                    | 4        |
| 5.   | Co doped ZnO                                        | 350 @ 100 ppm     | 19/27 @ 100 ppm                        | 140                        | 50 ppb                      | 5        |
| 6.   | Pt-Co <sub>3</sub> O <sub>4</sub> /MoS <sub>2</sub> | 7.43 @ 1000 ppm   | -                                      | 170                        | 500 ppm                     | 6        |
| 7.   | NiO/RGO                                             | 15.2% @ 1000 ppm  | 18/20 @ 500 ppm                        | 260                        | 100 ppm                     | 7        |
| 8.   | Few Layered Boron Nanostructure                     | 90.2% @ 80 ppm    | 41.8/52 @ 39.6 @ 80 ppm                | RT                         | 50 ppm<br>(50 ppm- 105 ppm) | Our work |

Table S2 Comparison of Few Layered Boron Sheets based methane sensor with other Room Temperature Methane sensor.

| S.No | Material                        | Response (%)     | Concentration Range (ppm) | Response Time/ Recovery Time (Seconds) | LOD                         | Ref.     |
|------|---------------------------------|------------------|---------------------------|----------------------------------------|-----------------------------|----------|
| 1    | RGO/SnO <sub>2</sub>            | 76 @ 10,000 ppm  | 10,000-80,000             | 200/- @ 10,000 ppm                     | 10,000 ppm                  | 8        |
| 2    | Au/VO <sub>x</sub>              | 18.2 @ 500 ppm   | 500-2000                  | ~2000/1000 @ 500 ppm                   | 500 ppm                     | 9        |
| 3    | PANI/ZnO                        | 48@100 ppm       | 100-500                   | 20/>250 @ 500 ppm                      | 100 ppm                     | 10       |
| 4    | PbS                             | ~12 @ 10,000 ppm | 10,000-50,000             | -/-                                    | 10,000 ppm                  | 11       |
| 5    | TiO <sub>2</sub>                | ~610 @ 5 ppm     | 5-100                     | 45/33 @ 60 ppm                         | 5 ppm                       | 12       |
| 6    | Few Layered Boron Nanostructure | 43.5 @ 50 ppm    | 50-105                    | 41.8/52 @ 39.6 @ 80 ppm                | 50 ppm<br>(50 ppm- 105 ppm) | Our work |

## Supplementary References

1. P. Bhattacharyya, P. Basu, B. Mondal and H. J. M. R. Saha, 2008, **48**, 1772-1779.
2. A. Biaggi-Labiosa, F. Solá, M. Lebrón-Colón, L. J. Evans, J. C. Xu, G. W. Hunter, G. M. Berger and J. M. González, *Nanotechnology*, 2012, **23**, 455501.
3. N. M. Shaalan, M. Rashad and M. A. Abdel-Rahim, *Materials Science in Semiconductor Processing*, 2016, **56**, 260-264.
4. N. M. Shaalan, M. Rashad, A. H. Moharram and M. A. Abdel-Rahim, *Materials Science in Semiconductor Processing*, 2016, **46**, 1-5.
5. J. Hu, F. Gao, Z. Zhao, S. Sang, P. Li, W. Zhang, X. Zhou and Y. Chen, *Applied Surface Science*, 2016, **363**, 181-188.
6. D. Zhang, H. Chang, Y. e. Sun, C. Jiang, Y. Yao and Y. Zhang, *Sensors and Actuators B: Chemical*, 2017, **252**, 624-632.
7. D. Zhang, H. Chang, P. Li and R. Liu, *Journal of Materials Science: Materials in Electronics*, 2016, **27**, 3723-3730.
8. K. C. Lam, B. Huang and S.-Q. Shi, *Journal of Materials Chemistry A*, 2017, **5**, 11131-11142.
9. J. Liang, J. Liu, N. Li and W. Li, *Journal of Alloys and Compounds*, 2016, **671**, 283-290.
10. T. Sen, S. Mishra, S. S. Sonawane and N. G. Shimpi, 2018, **58**, 1438-1445.
11. A. Mosahebfard, H. D. Jahromi and M. H. Sheikhi, *IEEE Sensors Journal*, 2016, **16**, 4174-4179.
12. Z. P. Tshabalala, K. Shingange, B. P. Dhonge, O. M. Ntwaeaborwa, G. H. Mhlongo and D. E. Motaung, *Sensors and Actuators B: Chemical*, 2017, **238**, 402-419.
